# Supplementary material for: Predicting protein subcellular locations using hierarchical ensemble of Bayesian classifiers based on Markov chains
Source: PubMed Central journal article supplement (PMC1525000; doi:10.1186/1471-2105-7-298), 2006-06-14
Supplement: 1471-2105-7-298-S1.pdf [file 1471-2105-7-298-S1.pdf]

## Additional material

**Table 1**

Confusion matrix of prediction results of HensBC approach for Data\_Euk.

|               | Predicted group |               |               |            | Sum  |
|---------------|-----------------|---------------|---------------|------------|------|
|               | Cytoplasmic     | Extracellular | Mitochondrial | Nuclear    |      |
| Cytoplasmic   | <b>522</b>      | 30            | 46            | 86         | 684  |
| Extracellular | 28              | <b>256</b>    | 9             | 32         | 325  |
| Mitochondrial | 87              | 14            | <b>170</b>    | 50         | 321  |
| Nuclear       | 84              | 18            | 33            | <b>962</b> | 1097 |
| Sum           | 721             | 318           | 258           | 1130       | 2427 |

**Table 2**

Confusion matrix of prediction results of HensBC approach for Data\_Prok.

|               | Predicted group |               |             | Sum |
|---------------|-----------------|---------------|-------------|-----|
|               | Cytoplasmic     | Extracellular | Periplasmic |     |
| Cytoplasmic   | <b>657</b>      | 1             | 30          | 688 |
| Extracellular | 8               | <b>78</b>     | 21          | 107 |
| Periplasmic   | 31              | 16            | <b>155</b>  | 202 |
| Sum           | 696             | 95            | 206         | 997 |

**Table 3**

Confusion matrix of prediction results of HensBC approach for Data\_SWISS.

|               | Predicted group |             |           |           |             |          |            |            |             |           |           | Sum   |
|---------------|-----------------|-------------|-----------|-----------|-------------|----------|------------|------------|-------------|-----------|-----------|-------|
|               | Chlor           | Cytop       | Cytos     | End       | Ext         | Gol      | Lys        | Mit        | Nuc         | Per       | Vac       |       |
| Chloroplast   | <b>868</b>      | 96          | 0         | 5         | 31          | 1        | 2          | 85         | 50          | 7         | 0         | 1145  |
| Cytoplasm     | 71              | <b>1867</b> | 7         | 12        | 97          | 4        | 9          | 131        | 253         | 13        | 1         | 2465  |
| Cytoskeleton  | 0               | 3           | <b>16</b> | 0         | 0           | 0        | 0          | 1          | 4           | 0         | 0         | 24    |
| Endoplasmic   | 4               | 11          | 0         | <b>92</b> | 12          | 0        | 3          | 5          | 8           | 1         | 1         | 137   |
| Extracellular | 48              | 170         | 0         | 10        | <b>3643</b> | 7        | 39         | 64         | 222         | 14        | 11        | 4228  |
| Golgi         | 1               | 6           | 0         | 0         | 5           | <b>7</b> | 1          | 3          | 11          | 0         | 0         | 34    |
| Lysosome      | 0               | 5           | 0         | 0         | 14          | 0        | <b>105</b> | 3          | 3           | 1         | 0         | 131   |
| Mitochondria  | 82              | 145         | 0         | 5         | 44          | 1        | 5          | <b>709</b> | 102         | 12        | 1         | 1106  |
| Nuclear       | 43              | 230         | 10        | 10        | 121         | 7        | 6          | 70         | <b>2915</b> | 4         | 3         | 3419  |
| Peroxisome    | 6               | 20          | 0         | 1         | 5           | 0        | 1          | 13         | 5           | <b>71</b> | 0         | 122   |
| Vacuole       | 0               | 2           | 0         | 1         | 12          | 0        | 2          | 3          | 6           | 0         | <b>28</b> | 54    |
| Sum           | 1123            | 2555        | 33        | 136       | 3984        | 27       | 173        | 1087       | 3579        | 123       | 45        | 12865 |

**Table 4**

Confusion matrix of prediction results of HensBC approach for Data\_Gram.

|                | Predicted group |                |            |                |            | Sum  |
|----------------|-----------------|----------------|------------|----------------|------------|------|
|                | Cytoplasm       | Inner membrane | Periplasm  | Outer membrane | Extracell  |      |
| Cytoplasmic    | <b>223</b>      | 13             | 37         | 14             | 3          | 290  |
| Inner membrane | 28              | <b>291</b>     | 9          | 9              | 2          | 339  |
| Periplasmic    | 23              | 11             | <b>239</b> | 18             | 11         | 302  |
| Outer membrane | 11              | 4              | 18         | <b>378</b>     | 23         | 434  |
| Extracellular  | 7               | 4              | 17         | 31             | <b>167</b> | 226  |
| Sum            | 292             | 323            | 320        | 450            | 206        | 1591 |

**Table 5**

Confusion matrix of prediction results of HensBC approach for Data\_Gram with 9 locations. Numbers in round brackets represent the number of correctly predicted proteins according to the partial credit method.

|           | Predicted group |          |            |           |            |           |            |           |            |               |
|-----------|-----------------|----------|------------|-----------|------------|-----------|------------|-----------|------------|---------------|
|           | Cyt             | Cyt/In_m | In_m       | In_m/Per  | Per        | Per/Out_m | Out_m      | Out_m/Ext | Ext        | Sum           |
| Cyt       | <b>213</b>      | 3        | 11         | 1         | 37         | 0         | 8          | 0         | 5          | (214.5)/278   |
| Cyt/In_m  | 10              | <b>2</b> | 3          | 0         | 1          | 0         | 0          | 0         | 0          | (8.5)/16      |
| In_m      | 21              | 1        | <b>269</b> | 2         | 9          | 0         | 4          | 0         | 3          | (270.5)/309   |
| In_m/Per  | 10              | 1        | 4          | <b>22</b> | 10         | 0         | 3          | 0         | 1          | (29)/51       |
| Per       | 19              | 3        | 7          | 5         | <b>204</b> | 0         | 19         | 1         | 18         | (206.5)/276   |
| Per/Out_m | 0               | 0        | 0          | 0         | 1          | <b>0</b>  | 1          | 0         | 0          | (1)/2         |
| Out_m     | 13              | 3        | 2          | 0         | 10         | 2         | <b>335</b> | 11        | 15         | (341.5)/391   |
| Out_m/Ext | 0               | 0        | 0          | 0         | 1          | 0         | 11         | <b>58</b> | 8          | (67.5)/78     |
| Ext       | 7               | 0        | 4          | 1         | 14         | 0         | 18         | 11        | <b>135</b> | (140.5)/190   |
| Sum       | 293             | 13       | 300        | 31        | 287        | 2         | 399        | 81        | 185        | (1279.5)/1591 |

**Table 6**

Confusion matrix of prediction results of HensBC approach for Data\_OMP.

|          | Predicted group |            |      |
|----------|-----------------|------------|------|
|          | OMP             | Globular   | Sum  |
| OMP      | <b>355</b>      | 22         | 377  |
| Globular | 70              | <b>604</b> | 674  |
| Sum      | 425             | 626        | 1051 |

**Table 7**

Confusion matrix of prediction results of HensBC approach for Data\_Apoptosis.

|                 | Predicted group |                 |               |          | Sum |
|-----------------|-----------------|-----------------|---------------|----------|-----|
|                 | Cytoplasmic     | Plasma membrane | Mitochondrial | Other    |     |
| Cytoplasmic     | <b>41</b>       | 2               | 0             | 0        | 43  |
| Plasma membrane | 0               | <b>27</b>       | 3             | 0        | 30  |
| Mitochondrial   | 0               | 1               | <b>12</b>     | 0        | 13  |
| Other           | 3               | 1               | 0             | <b>8</b> | 12  |
| Sum             | 44              | 31              | 15            | 8        | 98  |
